# Supplementary material for: Anti-Inflammatory Effects of Formononetin 7-O-phosphate, a Novel Biorenovation Product, on LPS-Stimulated RAW 264.7 Macrophage Cells
Source: MDPI journal article supplement (doi:10.3390/molecules24213910), 2019-10-30
Supplement: s1 [file s1]

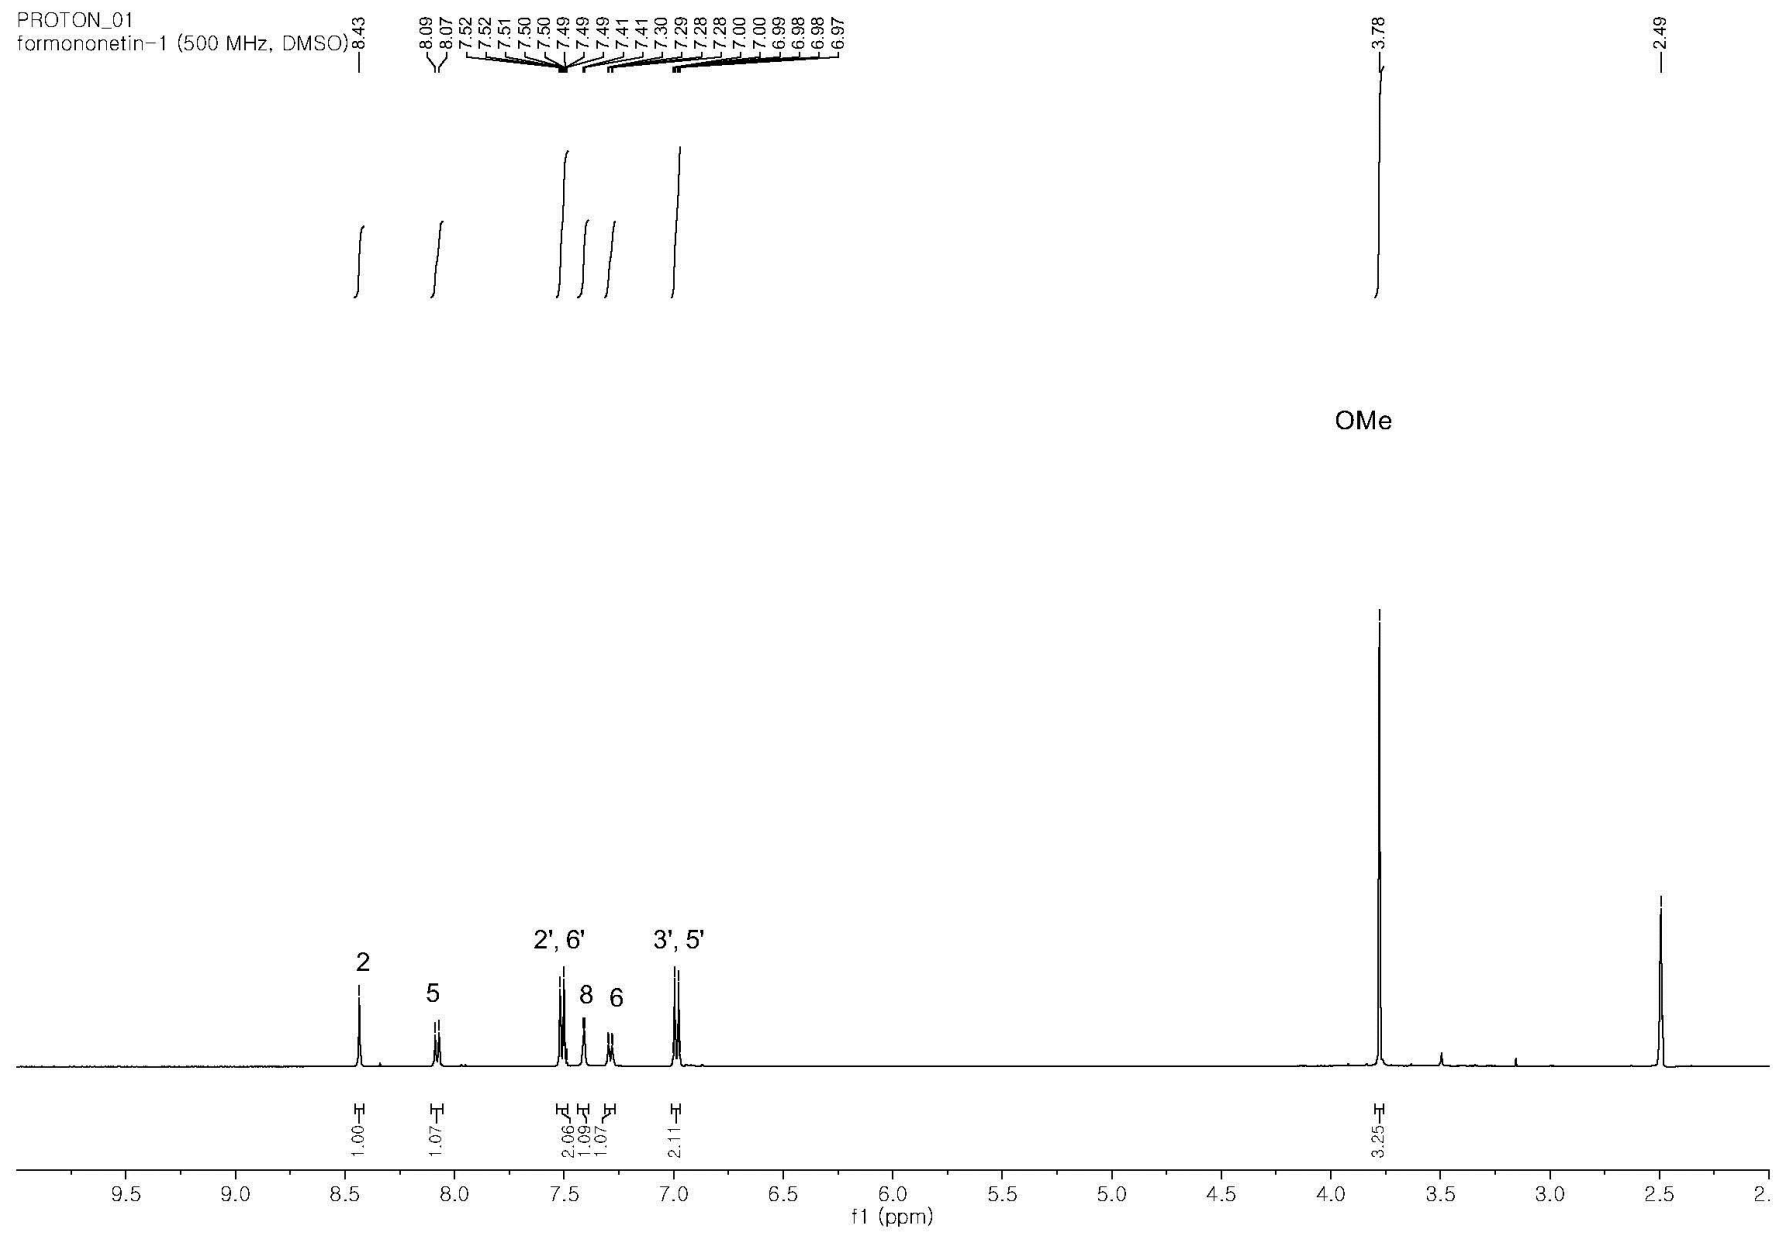

Figure S1.  $^1\text{H}$  NMR of formononetin 7-*O*-phosphate (FMP, 1)

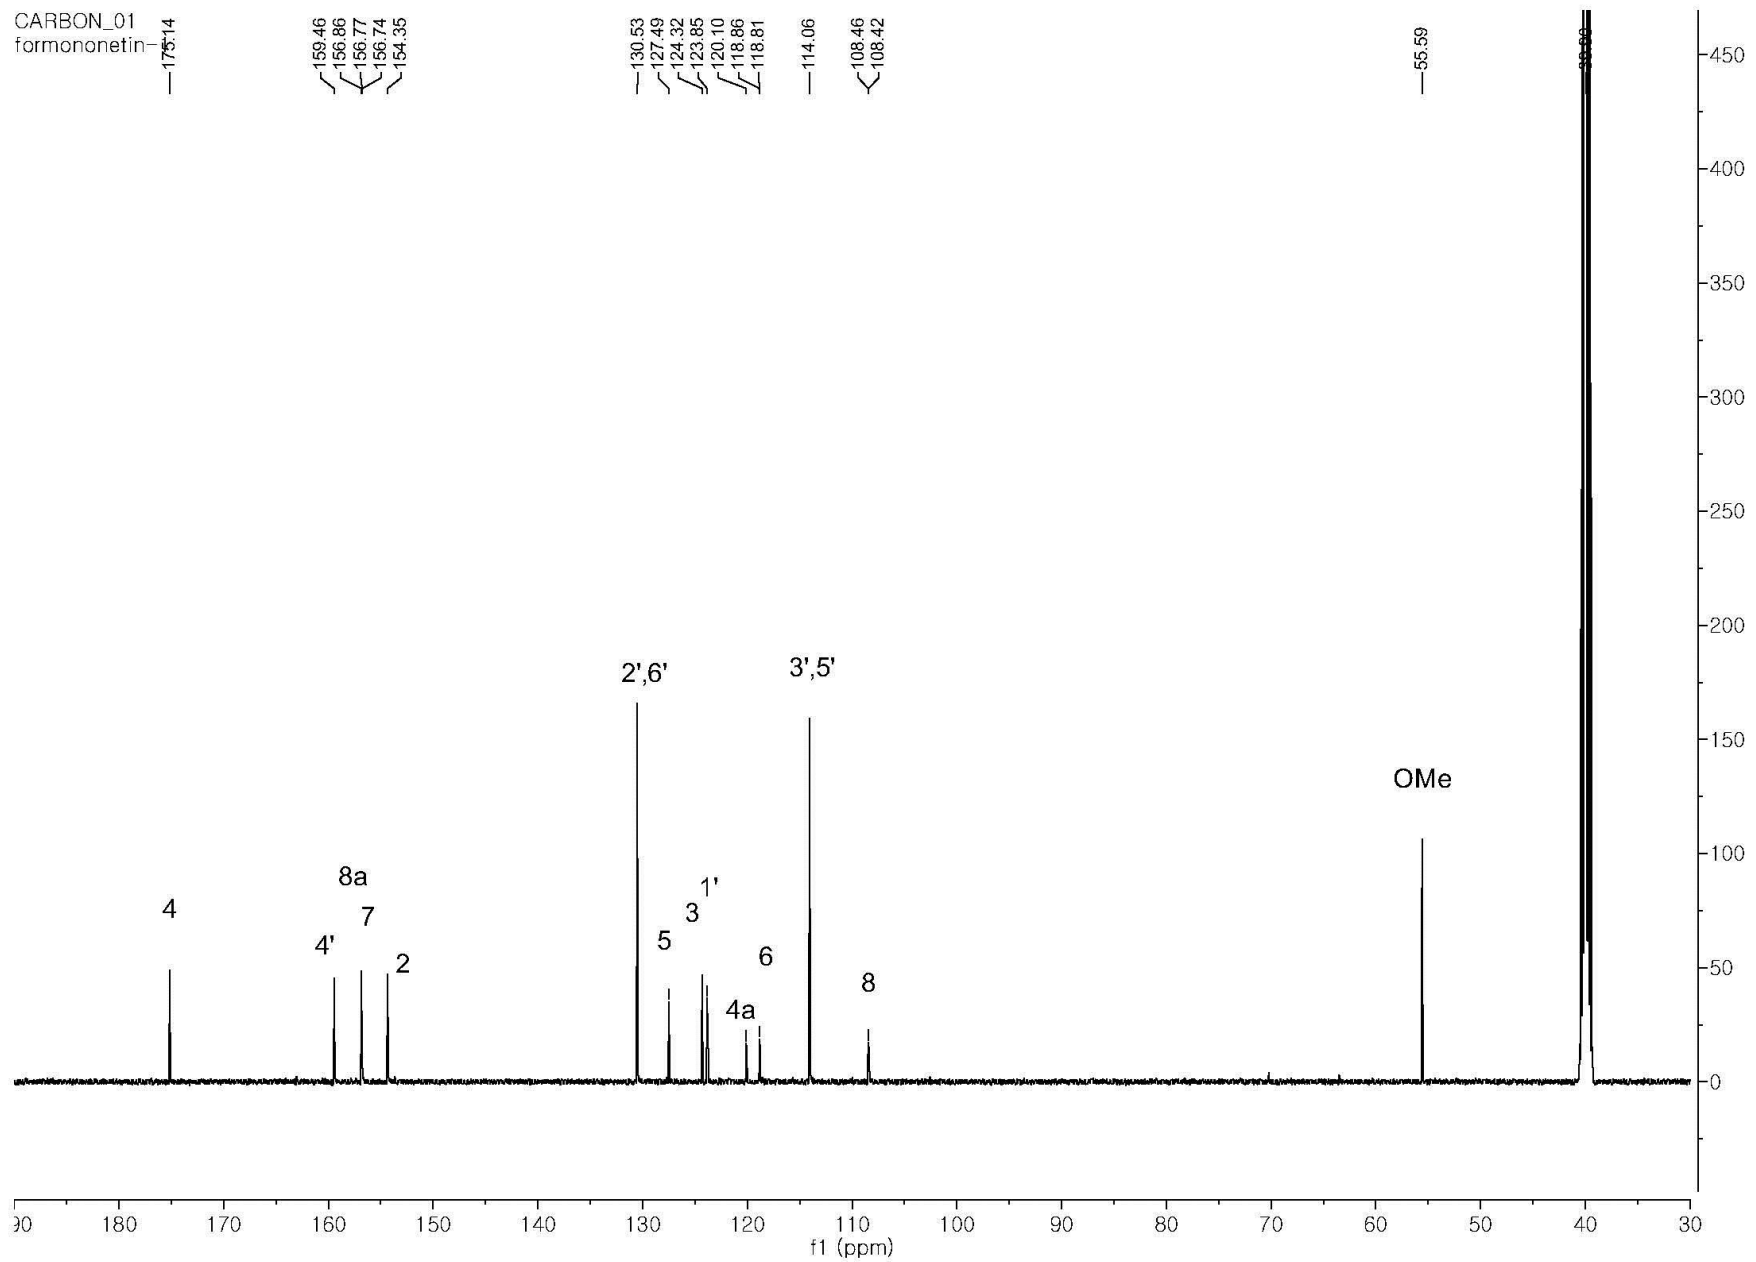

Figure S2.  $^{13}\text{C}$  NMR of formononetin 7-*O*-phosphate (FMP, 1)

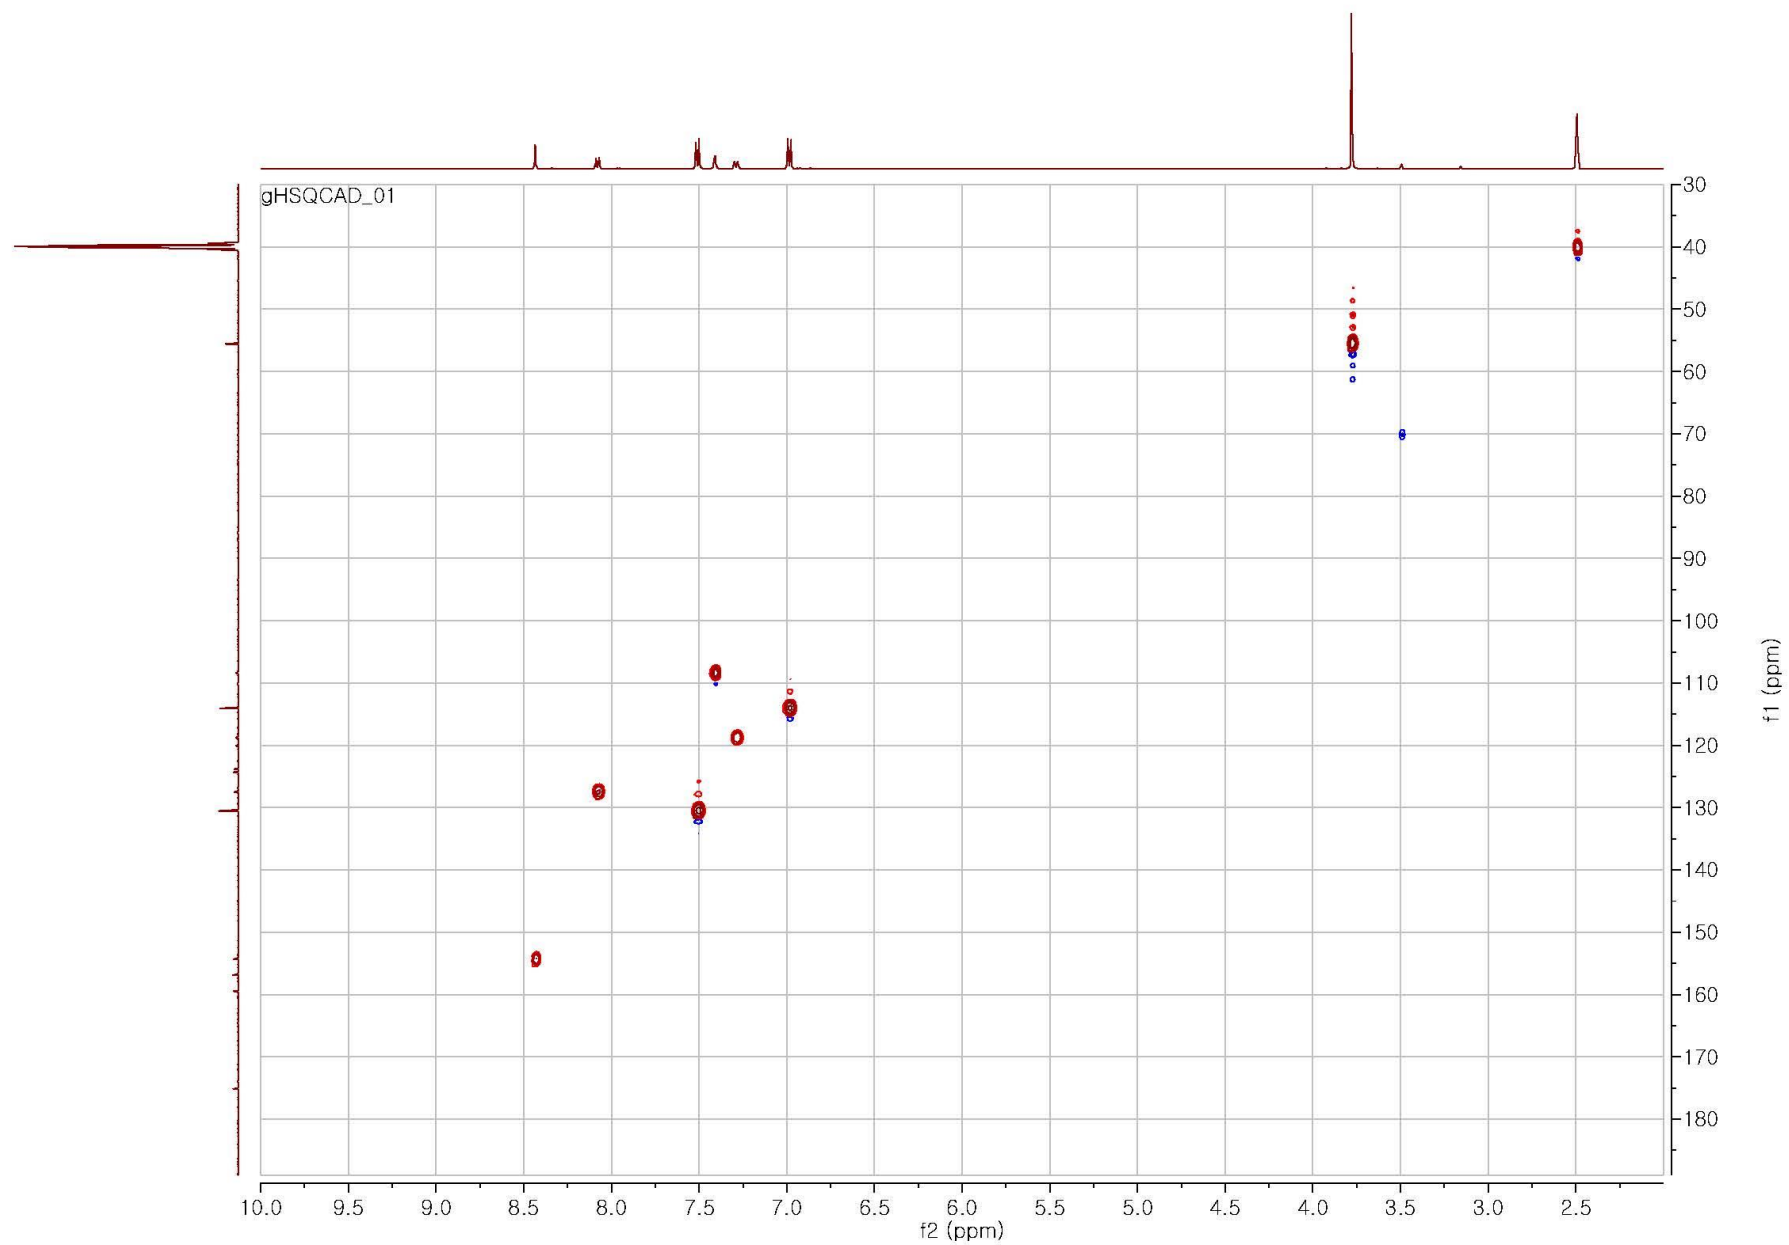

Figure S3. HSQC correlation of formononetin 7-*O*-phosphate (FMP, 1)

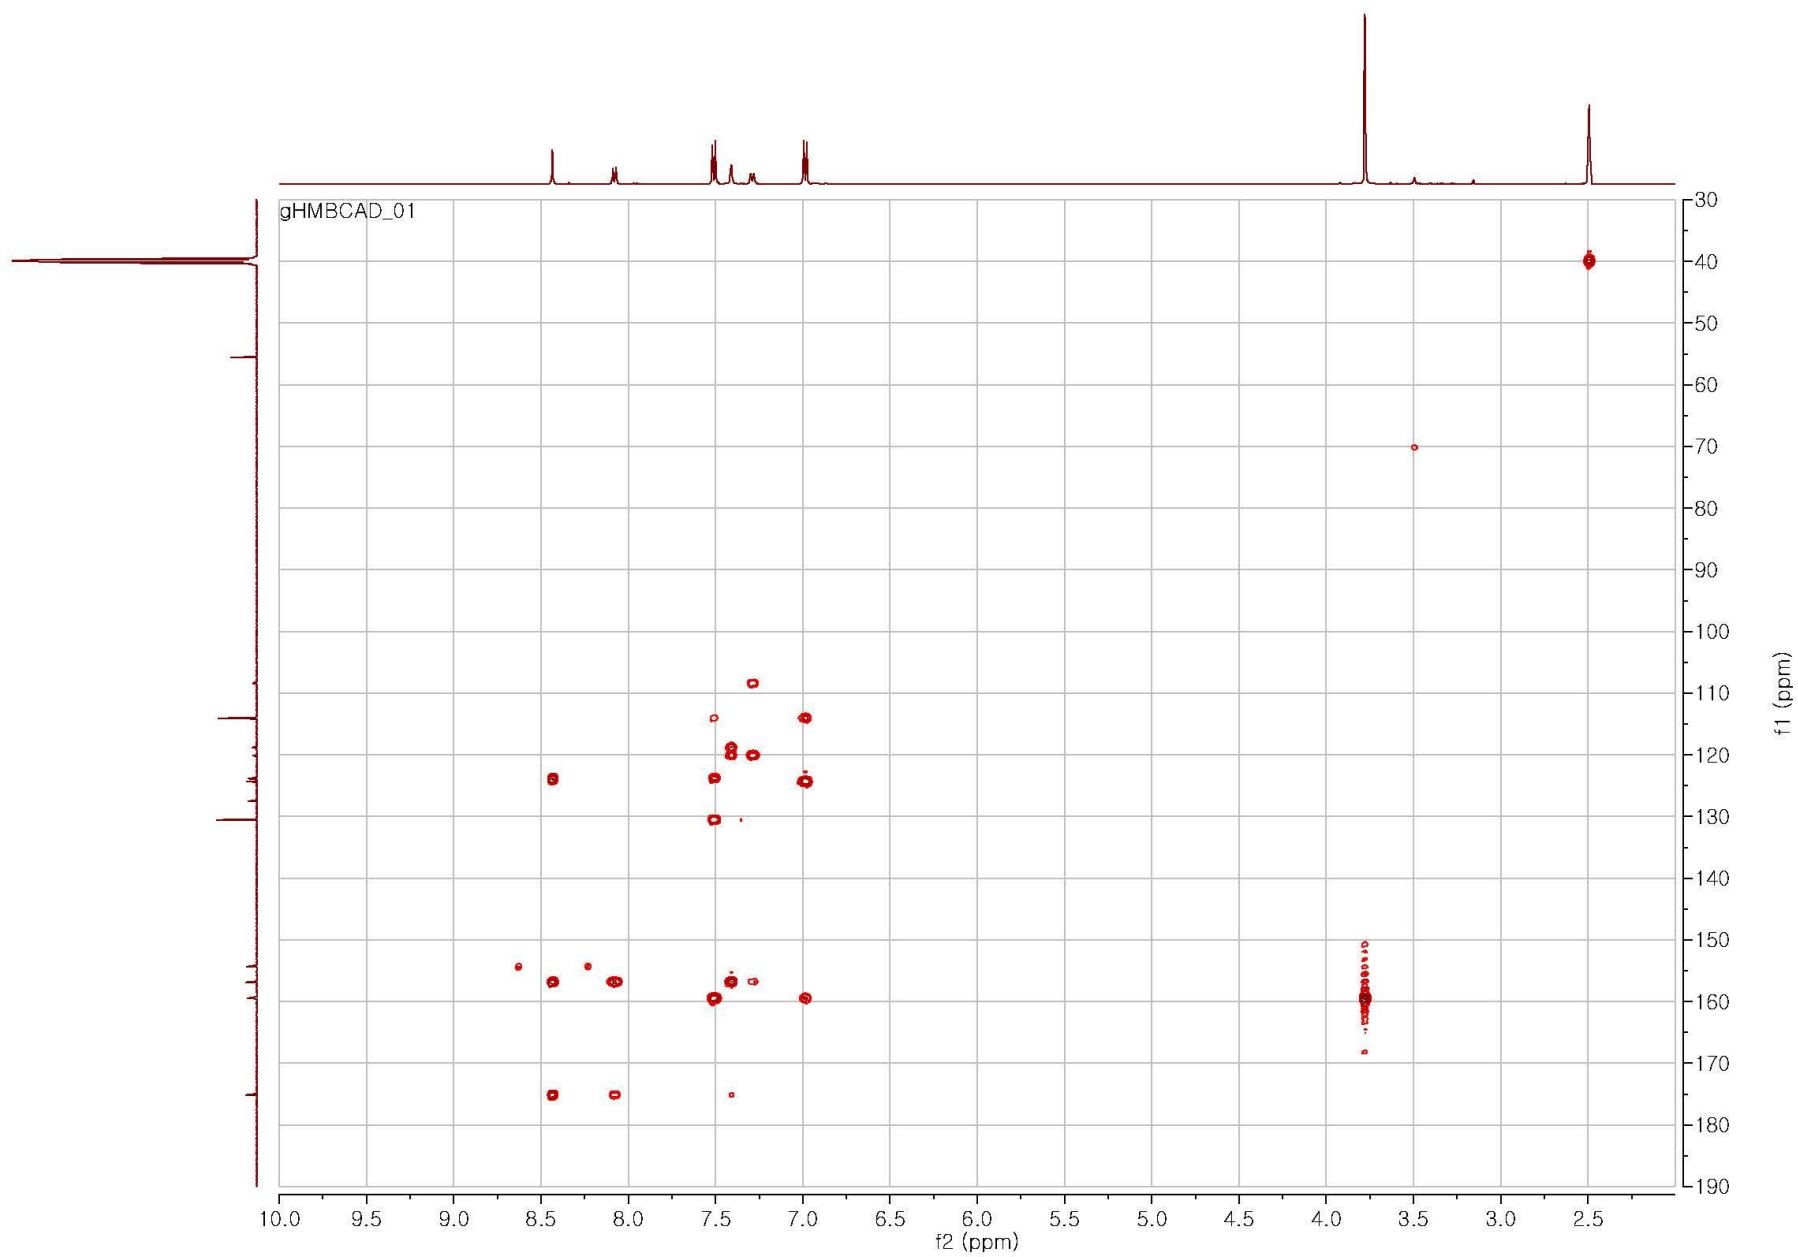

Figure S4. HMBC correlation of formononetin 7-*O*-phosphate (FMP, 1)

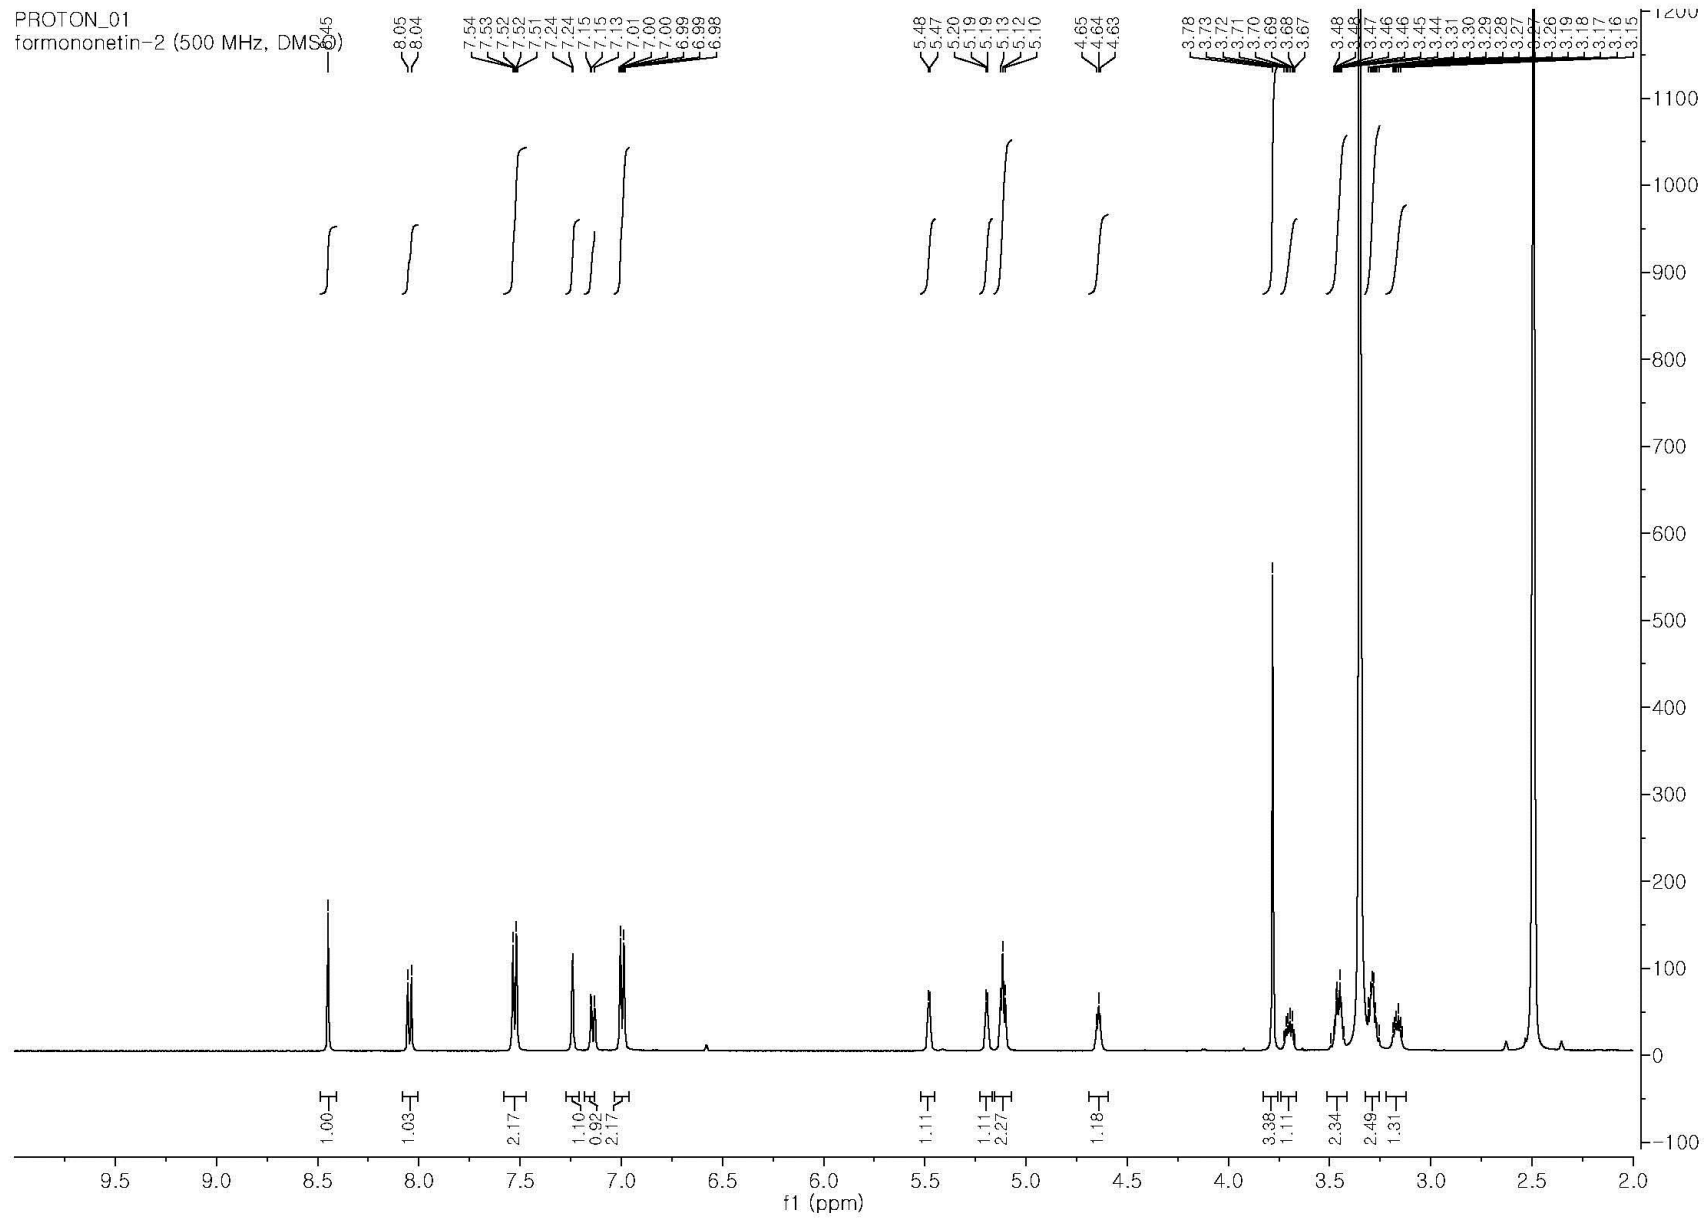

Figure S5. <sup>1</sup>H NMR of formononetin 7-*O*-glucoside
